# Supplementary material for: Fabrication of Yttrium Oxide Hollow Films for Efficient Passive Radiative Cooling
Source: MDPI journal article supplement (doi:10.3390/ma16237373), 2023-11-27
Supplement: s1 [file s1]

## Supplementary

# Fabrication of Yttrium Oxide Hollow Films for Efficient Passive Radiative Cooling

Heegyeom Jeon <sup>1</sup>, Sohyeon Sung <sup>2</sup>, Jeehoon Yu <sup>1</sup>, Hyun Kim <sup>2</sup>, Yong Seok Kim <sup>2</sup>  
and Youngjae Yoo <sup>1,\*</sup>

<sup>1</sup> Department of Advanced Materials Engineering, Chung-Ang University, Anseong 17546, Republic of Korea; avel004@cau.ac.kr (H.J.); yujeehoon@cau.ac.kr (J.Y.)

<sup>2</sup> Advanced Materials Division, Korea Research Institute of Chemical Technology (KRICT), Daejeon 34114, Republic of Korea; gus6319@kRICT.re.kr (S.S.); hyunkim@kRICT.re.kr (H.K.); yongskim@kRICT.re.kr (Y.S.K.)

\* Correspondence: yjyoo@cau.ac.kr

**3 pages in total, including 4 figures.**

### Table of contents

**Figure S1 SEM–EDS images of the MF particles: (a)SEM image, (b) C, (c) N, and (d) O**

**Figure S2 SEM-EDS images of the MF@Y(OH)CO<sub>3</sub> particles: (a) SEM image, (b) C, (c) N, and (d) Y**

**Figure S3 SEM-EDS images of the H-Y<sub>2</sub>O<sub>3</sub> particles: (a) SEM image, (b) C, (c) O, and (d) Y**

**Figure S4. Optical images of the flexibility of the (a) BaSO<sub>4</sub>, (b) MF@Y(OH)CO<sub>3</sub>, and (c) H-Y<sub>2</sub>O<sub>3</sub> PRC fillers**

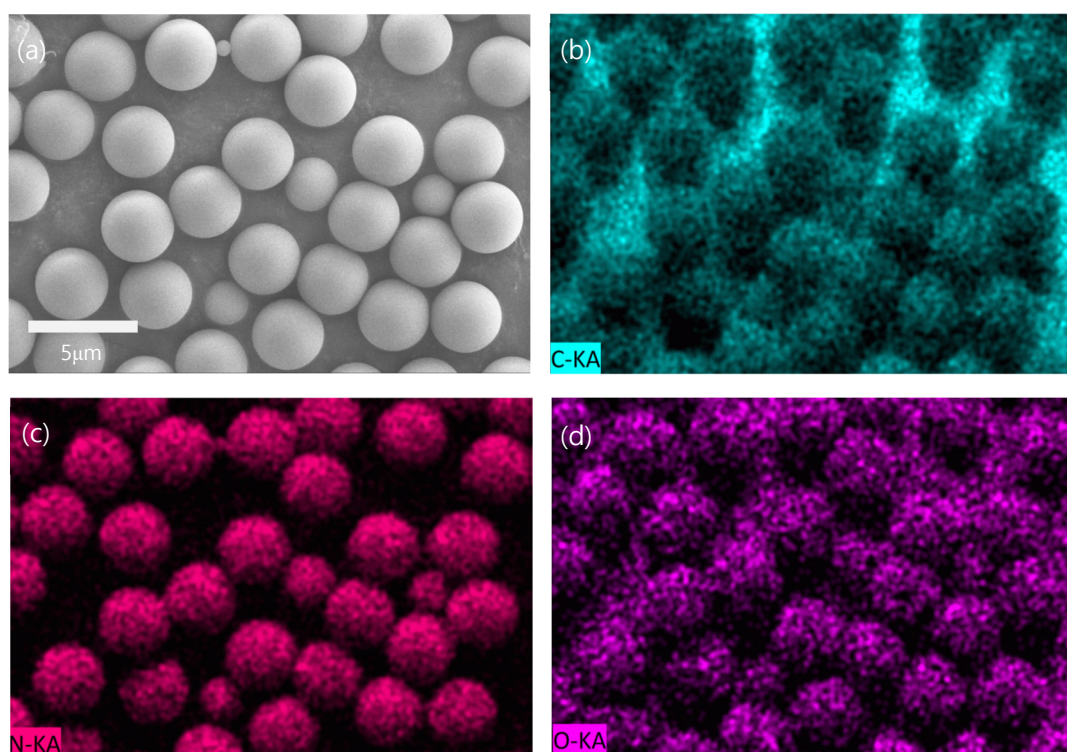

**Figure S1 SEM-EDS images of the MF particles: (a) SEM image, (b) C, (c) N, and (d) O**

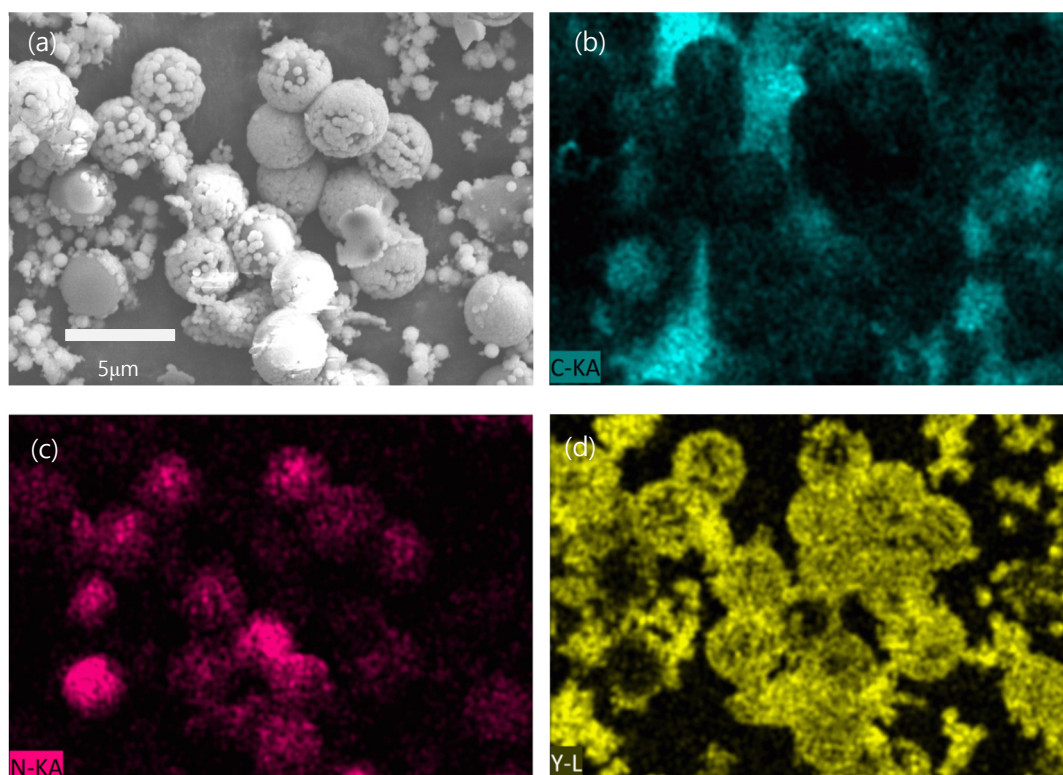

**Figure S2 SEM-EDS images of the MF@Y(OH)CO<sub>3</sub> particles: (a) SEM image, (b) C, (c) N, and (d) Y**

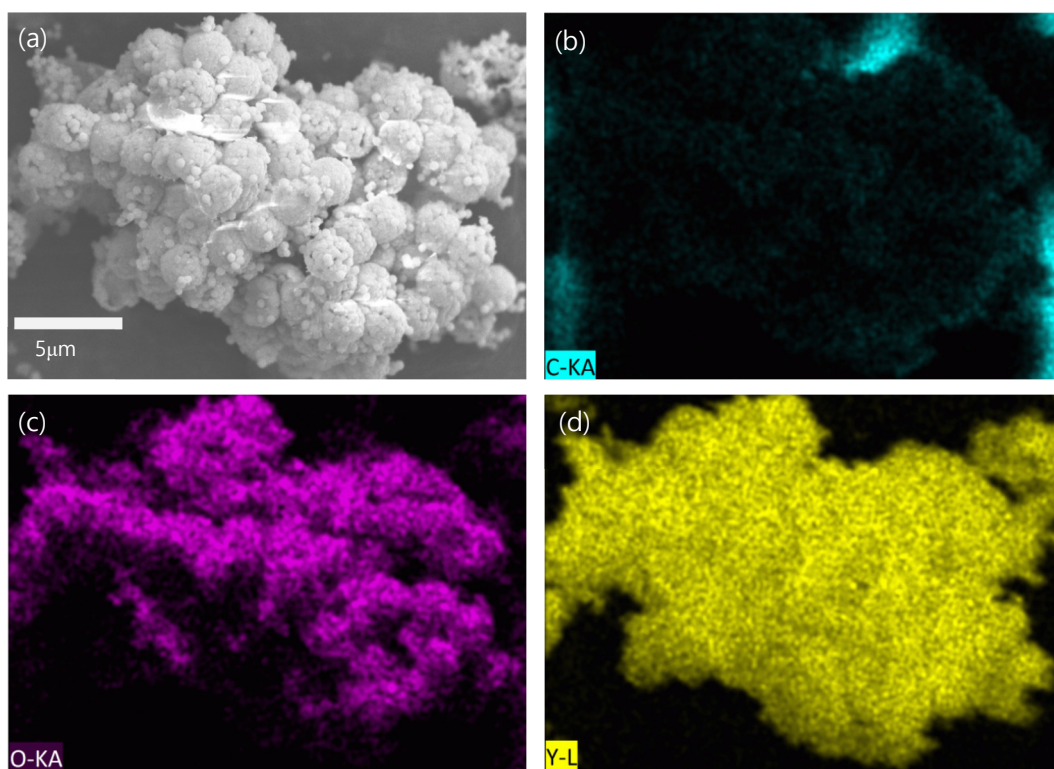

Figure S3 SEM-EDS images of the H-Y<sub>2</sub>O<sub>3</sub> particles: (a) SEM image, (b) C, (c) O, and (d) Y

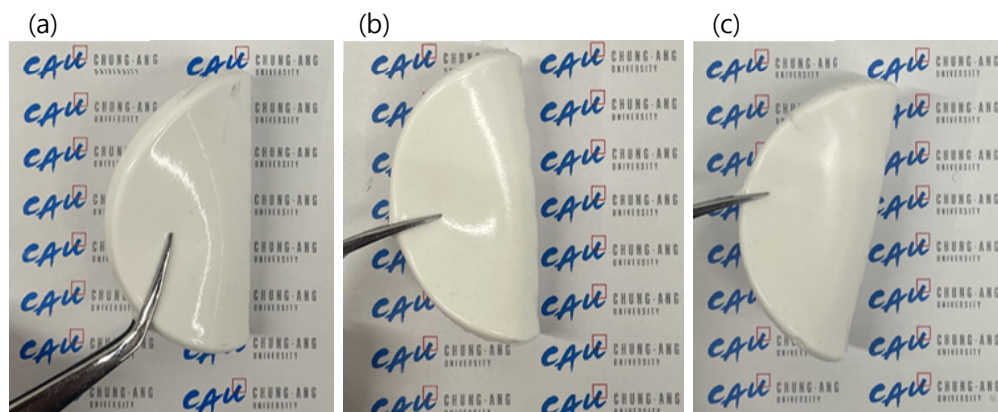

Figure S4. Optical image of (a) BaSO<sub>4</sub>, (b) MF@(OH)CO<sub>3</sub>, (c) H-Y<sub>2</sub>O<sub>3</sub>,
